# Supplementary material
Source: PubMed Central journal article supplement (PMC4376455)
Supplement: bph0172-1769-sd1.pdf [file bph0172-1769-sd1.pdf]

**Supplementary Data 1.** Effect of  $\sigma 1$  agonist, compound 1(S), on peripheral inflammatory state <sup>a</sup>.

|                                 | IFN- $\gamma$       | TNF- $\alpha$           | IL-17a               | IL-4                |
|---------------------------------|---------------------|-------------------------|----------------------|---------------------|
| Sham-vehicle                    | 0.57 ( $\pm 0.66$ ) | ND                      | 1.05 ( $\pm 0.20$ )  | 0.57 ( $\pm 0.14$ ) |
| Sham-1(S) 5 mg kg <sup>-1</sup> | 0.97 ( $\pm 0.92$ ) | ND                      | 2.90 ( $\pm 0.92$ )  | 0.53 ( $\pm 0.13$ ) |
| EAE-vehicle                     | 1.58 ( $\pm 7.51$ ) | 55.56 ( $\pm 453.60$ )  | 6.88 ( $\pm 33.03$ ) | 0.80 ( $\pm 2.62$ ) |
| EAE-1(S) 5 mg kg <sup>-1</sup>  | 1.31 ( $\pm 3.55$ ) | 117.50 ( $\pm 134.84$ ) | 4.70 ( $\pm 8.37$ )  | 0.44 ( $\pm 0.75$ ) |

<sup>a</sup> Quantification of IFN- $\gamma$ , TNF- $\alpha$ , IL-17a and IL-4 concentration (pg/ml) in serum was performed by ELISA. Sham-vehicle, sham-1(S) 5 mg kg<sup>-1</sup>, EAE-vehicle and EAE-1(S) 5 mg kg<sup>-1</sup> were used with 5–11 animals per treatment group. Mice were immunized to induce EAE and administered compound 1(S) 5 mg kg<sup>-1</sup> i.p., as described in Materials and Methods. Sera were collected at the peak of disease (i.e., on day 14 $\pm$ 2), when the clinical score for the EAE-vehicle group was 4.0, and for the EAE-1(S) group was 1.5. Data are presented as median $\pm$ IQR. ND, not detected.
